# Supplementary material for: Optimizing the Integration of Microwave Processing and Enzymatic Extraction to Produce Polyphenol-Rich Extracts from Olive Pomace
Source: MDPI journal article supplement (doi:10.3390/foods12203754), 2023-10-12
Supplement: s1 [file s1]

# Optimization of combined microwave- and enzyme-assisted green extraction aiming to produce polyphenols-rich extracts from olive pomace

Gabriela A. Macedo<sup>1,2</sup>; Paula de P. M. Barbosa<sup>1\*</sup>; Fernanda F. G. Dias<sup>2</sup>, Juliana M. L. N. M. Bell<sup>2,3</sup>

<sup>1</sup>Bioprocesses Laboratory. DEPAN/FEA (School of Food Engineering)/Unicamp (University of Campinas), R. Monteiro Lobato, 80, 13083970, Campinas, Brazil

<sup>2</sup>Department of Food Science and Technology, University of California, Davis, One Shields Avenue, Davis, CA 95616, United States

<sup>3</sup>Biological and Agricultural Engineering, University of California, Davis, One Shields Avenue, Davis, CA, 95616, United States

\*Corresponding author: paulamenezesbarbosa@gmail.com

## 1. Supplementary material

### 1.1. Tables

**Table S1.** Statistical analysis of the results of the 2<sup>4-1</sup> FFD used to determine the significant parameters for MEAE-Tan.

|                         | Effect | Std. error | P-value  |
|-------------------------|--------|------------|----------|
| Mean/Intercept          | 308.77 | 15.14      | 0.000001 |
| X1 (Temperature)        | 7.48   | 30.38      | 0.400612 |
| X2 (Ramp and hold time) | 15.81  | 30.38      | 0.621496 |
| X3 Pomace:water ratio   | -37.73 | 30.38      | 0.260623 |
| Enzyme concentration    | 215.93 | 30.38      | 0.000390 |

**Table S2.** Statistical analysis of the results of the 2<sup>4-1</sup> FFD used to determine the significant parameters for MEAE-Tan-Cel-Pec.

|                         | Effect | Std. error | P-value   |
|-------------------------|--------|------------|-----------|
| Mean/Intercept          | 112.95 | 3.12       | <0.000001 |
| X1 (Temperature)        | 32.56  | 6.25       | 0.002001  |
| X2 (Ramp and hold time) | -10.93 | 6.25       | 0.130885  |
| X3 Pomace:water ratio   | 14.56  | 6.25       | 0.058748  |
| Enzyme concentration    | 47.06  | 6.25       | 0.000285  |

**Table S3.** Analysis of variance (ANOVA) of MEAE-Tan results in 15 min of reaction.

| Source of variation | SS         | DF <sup>a</sup> | MS          | Fcal  | Ftab  | F Test <sup>b</sup> |
|---------------------|------------|-----------------|-------------|-------|-------|---------------------|
| Regression          | 21179609.4 | 5               | 4235921.886 | 16.43 | 5.05  | 3.254               |
| Residue             | 1288846.3  | 5               | 257769.2686 |       |       |                     |
| Lack of fit         | 1225659.3  | 3               | 408553.0871 | 12.93 | 19.16 | 0.675               |
| Pure error          | 63187.1    | 2               | 31593.54093 |       |       |                     |
| Total               | 22468455.8 | 10              |             |       |       |                     |

<sup>a</sup>Degree of freedom. <sup>b</sup>F (0.95; 5.5) = 5.05; F (0.95; 3.2) = 19.16. R<sup>2</sup> = 0.94264.

**Table S4.** Role of enzyme concentration and pomace/water ratio on the extractability of OP phenolics using MEAE-Tan in 15 min of reaction (2<sup>2</sup> CCRD results at 15 min and validation of the predictive model).

| Run               | Variables                                 |                                   | Total phenolic content (mg GAE/kg pomace) |                                |                 |
|-------------------|-------------------------------------------|-----------------------------------|-------------------------------------------|--------------------------------|-----------------|
|                   | X1<br>Enzyme<br>concentration<br>(%, w/w) | X2<br>Pomace:water<br>ratio (w/w) | Y <sub>exp</sub> <sup>a</sup>             | Y <sub>pred</sub> <sup>b</sup> | ΔY <sup>c</sup> |
| 1                 | (-1) 0.9                                  | (-1) 1:11                         | 3611.3                                    | 3835.3                         | 224.0           |
| 2                 | (1) 2.1                                   | (-1) 1:11                         | 5053.86                                   | 5661.6                         | 607.8           |
| 3                 | (-1) 0.9                                  | (1) 1:4.7                         | 1768.19                                   | 1333.7                         | -434.5          |
| 4                 | (1) 2.1                                   | (1) 1:4.7                         | 3440.32                                   | 3389.6                         | -50.7           |
| 5                 | (-1.41) 0.66                              | (0) 1:6.6                         | 1397.06                                   | 1582.1                         | 185.1           |
| 6                 | (+1.41) 2.34                              | (0) 1:6.6                         | 4678.48                                   | 4319.2                         | -359.3          |
| 7                 | (0) 1.5                                   | (-1.41) 1:15                      | 6388.8                                    | 5834.7                         | -554.1          |
| 8                 | (0) 1.5                                   | (+1.41) 1:4                       | 2089.38                                   | 2469.3                         | 379.9           |
| 9                 | (0) 1.5                                   | (0) 1:6.6                         | 2723.54                                   | 2929.1                         | 205.6           |
| 10                | (0) 1.5                                   | (0) 1:6.6                         | 3020.08                                   | 2929.1                         | -91.0           |
| 11                | (0) 1.5                                   | (0) 1:6.6                         | 3041.6                                    | 2929.1                         | -112.5          |
| <b>Validation</b> | <b>(2.34) 1.41</b>                        | <b>(1:15) -1.41</b>               | <b>7583.11</b>                            | <b>7110.6</b>                  | <b>-472.5</b>   |

<sup>a</sup>Experimental value. <sup>b</sup>Value predicted by the quadratic model. <sup>c</sup>Difference between predicted and experimental values.

**Table S5.** Role of temperature, enzyme concentration, and pomace/water ratio on the extractability of OP phenolics using MEAE-Tan-Cel-Pec in 15 min of reaction (2<sup>3</sup> CCRD results at 15 min and validation of the predictive model).

| Run               | Variables              |                                           |                                   | Total phenolic content (mg GAE/kg pomace) |                               |                 |
|-------------------|------------------------|-------------------------------------------|-----------------------------------|-------------------------------------------|-------------------------------|-----------------|
|                   | X1<br>Temperature (°C) | X2<br>Enzyme<br>concentration<br>(%, w/w) | X3<br>Pomace:water<br>ratio (w/w) | Y <sub>pred</sub> <sup>a</sup>            | Y <sub>exp</sub> <sup>b</sup> | ΔY <sup>c</sup> |
| 1                 | (-1) 55                | (-1) 0.9                                  | (-1) 1:11                         | 1403.45                                   | 1201.58                       | 201.9           |
| 2                 | (1) 65                 | (-1) 0.9                                  | (-1) 1:11                         | 1226.62                                   | 1037.43                       | 189.2           |
| 3                 | (-1) 55                | (1) 2.1                                   | (-1) 1:11                         | 1944.94                                   | 1874.3                        | 70.6            |
| 4                 | (1) 65                 | (1) 2.1                                   | (-1) 1:11                         | 1768.32                                   | 1591.75                       | 176.6           |
| 5                 | (-1) 55                | (-1) 0.9                                  | (1) 1:4.7                         | 657.74                                    | 720.3                         | -62.6           |
| 6                 | (1) 65                 | (-1) 0.9                                  | (1) 1:4.7                         | 610.59                                    | 567.22                        | 43.4            |
| 7                 | (-1) 55                | (1) 2.1                                   | (1) 1:4.7                         | 728.51                                    | 803.69                        | -75.2           |
| 8                 | (1) 65                 | (1) 2.1                                   | (1) 1:4.7                         | 681.56                                    | 769.42                        | -87.9           |
| 9                 | (-1.68) 46.5           | (0) 1.5                                   | (0) 1:6.6                         | 995.61                                    | 1020.9                        | -25.3           |
| 10                | (+1.68) 73.5           | (0) 1.5                                   | (0) 1:6.6                         | 807.63                                    | 943.92                        | -136.3          |
| 11                | (0) 60                 | (-1.68) 0.5                               | (0) 1:6.6                         | 527.30                                    | 693.72                        | -166.4          |
| 12                | (0) 60                 | (+1.68) 2.0                               | (0) 1:6.6                         | 1041.77                                   | 1036.94                       | 4.8             |
| 13                | (0) 60                 | (0) 1.5                                   | (-1.68) 1:20                      | 2390.02                                   | 2715.01                       | -325.0          |
| 14                | (0) 60                 | (0) 1.5                                   | (+1.68) 1:4                       | 850.75                                    | 687.34                        | 163.4           |
| 15                | (0) 60                 | (0) 1.5                                   | (0) 1:6.6                         | 696.33                                    | 629.56                        | 66.8            |
| 16                | (0) 60                 | (0) 1.5                                   | (0) 1:6.6                         | 696.33                                    | 735.42                        | -39.1           |
| 17                | (0) 60                 | (0) 1.5                                   | (0) 1:6.6                         | 696.33                                    | 695.32                        | 1.0             |
| <b>Validation</b> | <b>(-1.68) 46.5</b>    | <b>(1.68) 2.0</b>                         | <b>(-1.68) 1:20</b>               | <b>2793.00</b>                            | <b>2938.25</b>                | <b>-145.25</b>  |

<sup>a</sup>Total phenolic content predicted by the quadratic model. <sup>b</sup>Experimental total phenolic content.

<sup>c</sup>Difference between predicted and experimental values.

**Table S6.** Analysis of variance (ANOVA) of MEAE-Tan-Cel-Pec results in 15 min of reaction.

| Source of variation | SS         | DF <sup>a</sup> | MS          | Fcal  | Ftab | F-Test <sup>b</sup> |
|---------------------|------------|-----------------|-------------|-------|------|---------------------|
| Regression          | 4603728.97 | 9               | 511525.4409 | 11.29 | 3.68 | 3.07                |
| Residue             | 317119.5   | 7               | 45302.79014 |       |      |                     |
| Lack of fit         | 311406.6   | 5               | 62281.32438 | 21.80 | 19.3 | 1.13                |
| Pure error          | 5712.9     | 2               | 2856.454533 |       |      |                     |
| Total               | 4920848.5  | 16              |             |       |      |                     |

<sup>a</sup>Degree of freedom. <sup>b</sup>F (0.95; 9,7) = 3.68; F (0.95; 5,2) = 19. R<sup>2</sup> = 0.93.

## 1.2. Figures

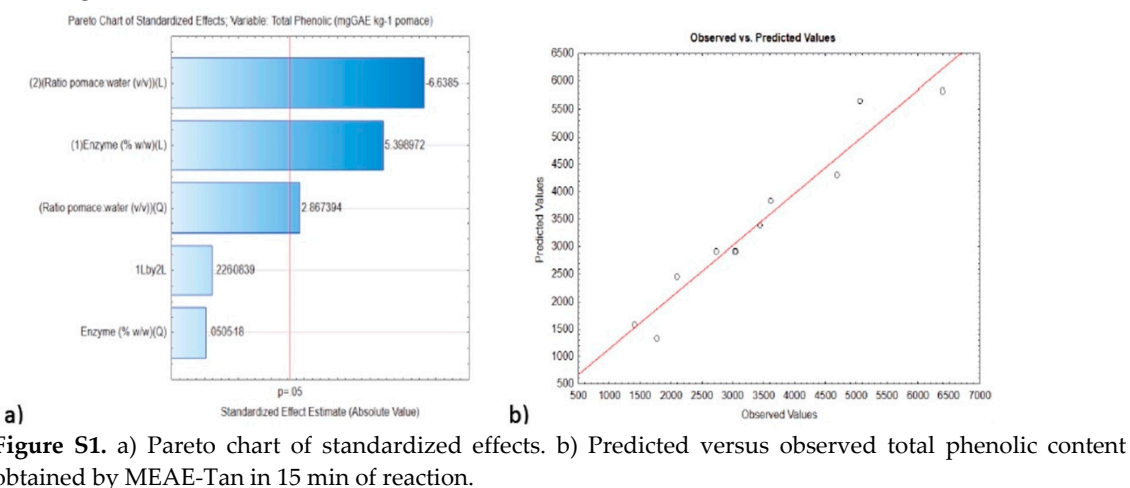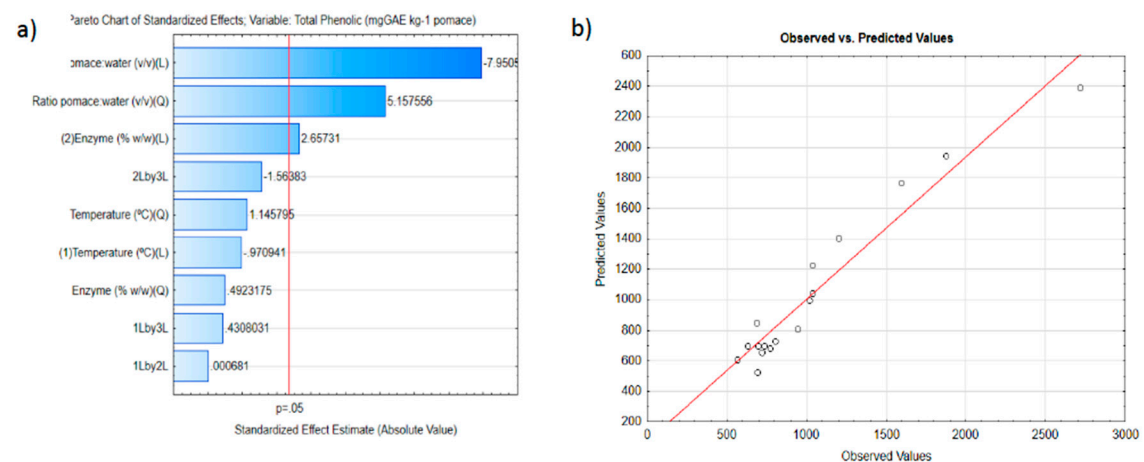

**Figure S2.** a) Pareto chart of standardized effects. b) Predicted versus observed total phenolic content obtained by MEAE-Tan-Cel-Pec in 15 min of reaction.
